1 **Targeted quantification of phosphorylation sites identifies STRIPAK-dependent**  
2 **phosphorylation of the Hippo pathway-related kinase SmKIN3**

3

4 Valentina Stein<sup>1</sup>, Bernhard Blank-Landeshammer<sup>2</sup>, Ramona Märker<sup>1</sup>, Albert Sickmann<sup>2</sup>, and Ulrich  
5 Kück<sup>1\*</sup>

6

7 <sup>1</sup>Allgemeine und Molekulare Botanik, Ruhr-Universität, 44780 Bochum, Germany, <sup>2</sup>Leibniz-Institut  
8 für Analytische Wissenschaften-ISAS-e.V., Otto-Hahn-Straße 6b, 44227 Dortmund, Germany,

9

10 \*Corresponding author: [ulrich.kueck@rub.de](mailto:ulrich.kueck@rub.de)

11

12 **Running title: STRIPAK dependent phosphorylation of GCK SmKIN3**

13

14 **Keywords:** phosphorylation site occupancy, striatin interacting phosphatase and kinase  
15 (STRIPAK)-complex, phosphoproteome, *Sordaria macrospora*, Protein phosphatase 2  
16 (PP2A), protein phosphorylation, serine/threonine protein kinase, fungi, cell differentiation

17

## 18 Abstract

19 We showed recently that the germinal centre  
20 kinase III (GCKIII) SmKIN3 from the fungus  
21 *Sordaria macrospora* is involved in sexual  
22 development and hyphal septation. Our recent  
23 extensive global proteome and  
24 phosphoproteome analysis revealed that  
25 SmKIN3 is a target of the striatin interacting  
26 phosphatase and kinase (STRIPAK) multi-  
27 subunit complex. Here, using protein samples  
28 from wild type and three STRIPAK mutants, we  
29 applied absolute quantification by parallel  
30 reaction monitoring (PRM) to analyze  
31 phosphorylation site occupancy in SmKIN3 and  
32 other septation initiation network (SIN)  
33 components, such as CDC7 and DBF2, as well  
34 as BUD4, acting downstream of SIN. For  
35 SmKIN3, we show that phosphorylation of  
36 S668 and S686 is decreased in mutants lacking  
37 distinct subunits of STRIPAK, while a third  
38 phosphorylation site, S589, was not affected.  
39 We constructed SmKIN3 mutants carrying  
40 phospho-mimetic and phospho-deficient  
41 codons for phosphorylation sites S589, S668  
42 and S686. Investigation of hyphae in a  
43  $\Delta$ SmKin3 strain complemented by the S668 and  
44 S686 mutants showed a hyper-septation  
45 phenotype, which was absent in the wild type,  
46 the  $\Delta$ SmKin3 strain complemented with wild  
47 type gene, or the mutant S589. Furthermore,  
48 localization studies with SmKIN3  
49 phosphorylation variants and STRIPAK  
50 mutants showed that SmKIN3 preferentially  
51 localizes at the terminal septa, which is  
52 distinctly different from the wild type strains.  
53 We conclude that STRIPAK-dependent  
54 phosphorylation of SmKIN3 has an impact on  
55 controlled septum formation and on the time-  
56 dependent localization of SmKIN3 on septa at  
57 the hyphal tip. Thus, STRIPAK seems to  
58 regulate SmKIN3, as well as DBF2 and BUD4  
59 phosphorylation, affecting septum formation.

## 60 Introduction

61 The STRIPAK multi-subunit complex  
62 functions as a macromolecular assembly  
63 communicating through physical interactions  
64 with other conserved signaling protein  
65 complexes to constitute larger dynamic protein  
66 networks. STRIPAK is involved in a broad  
67 variety of developmental processes in higher  
68 and lower eukaryotes. For example,  
69 proliferation of several mammalian cancer cells  
70 is correlated with dysfunctional STRIPAK  
71 subunits (1-3), and in fungal microorganisms,

72 the lack of STRIPAK results in sexual  
73 infertility, defects in hyphal fusion, and  
74 impaired pathogenicity or symbiotic  
75 interactions (4).

76 We are interested in identifying putative  
77 phosphorylation and dephosphorylation targets  
78 of STRIPAK in the filamentous fungus *S.*  
79 *macrospora*, a filamentous ascomycete closely  
80 related to *Neurospora crassa* (5). Techniques to  
81 globally quantify the proteome and  
82 phosphoproteome, such as label-free  
83 quantification (LFQ) and label-based  
84 approaches (isobaric Tags for Relative and  
85 Absolute Quantitation, iTRAQ, tandem mass  
86 tag, TMT), are indispensable for large-scale  
87 detection of changes in phosphorylation of  
88 peptides and the identification of potential  
89 molecular targets of kinases and phosphatases  
90 (6). We recently performed extensive isobaric  
91 tagging for relative and absolute quantification-  
92 based proteomic and phosphoproteomic  
93 analyses to identify potential targets of  
94 STRIPAK in *S. macrospora*. The proteome and  
95 phosphoproteome of the wild type and three  
96 different STRIPAK deletion mutants revealed a  
97 total of 4,193 proteins and 2,489  
98 phosphoproteins in all strains, where 1,727  
99 proteins were present in both proteomes.  
100 Among these, we identified 781  
101 phosphoproteins that showed differential  
102 phosphorylation in all mutants compared to the  
103 wild type (7). However, the functional role of  
104 the posttranslational protein modifications was  
105 only characterized in a few cases (7,8).

106 Certain inherent limitations with these shotgun  
107 methods, such as ratio compression and under  
108 sampling, can only be overcome by the  
109 complementary use of targeted mass  
110 spectrometry (MS) approaches. These can be  
111 employed as a means to validate a subset of the  
112 results obtained by shotgun experiments. While  
113 targeted MS is widely used for accurate protein  
114 quantification, the high variability, increased  
115 experimental effort, and need for validation has  
116 limited the implementation of targeted  
117 approaches in phosphoproteomics analysis (9).  
118 A hallmark study showed that 25% of  
119 differentially regulated phosphopeptides were  
120 attributed to alterations at the protein level (10).  
121 Thus, to accurately determine the  
122 phosphorylation ratio of a given site, targeted  
123 quantification of phosphorylation sites is highly  
124 appropriate to quantify both the corresponding  
125 phosphorylated and non-phosphorylated

126 peptides in order to obtain site-specific  
127 phosphorylation ratios (11,12).

128 Among the 781 regulated proteins in *S.*  
129 *macrospora* mentioned above (7), we found the  
130 GCKIII SmKIN3, which however was absent in  
131 the global proteome, and thus did not permit  
132 quantitative measurement of phosphorylation.  
133 Therefore, SmKIN3 phosphorylation was  
134 determined by applying absolute quantification  
135 by synthesis of stable isotope-labeled standard  
136 (SIS) peptides combined with PRM, a method  
137 which to the best of our knowledge has not yet  
138 been applied to a fungal organism.

139 SmKIN3 is involved in septation of hyphae and  
140 associated with the highly conserved SIN (13).  
141 The SIN complex, homologous to Hippo  
142 signaling in animals, comprises a STE-kinase, a  
143 GCK and a nuclear DBF2-related (NDR) kinase  
144 (14). For example, in *Neurospora crassa* the  
145 STE-kinase CDC-7 phosphorylates GCK  
146 SID-1, the homolog of SmKIN3, and activates  
147 DBF-2 (15). The function of SIN is essential for  
148 septation and cytokinesis, as demonstrated by  
149 SIN-deletion strains (13,15,16). BUD4, an  
150 anillin-related protein, acts further downstream  
151 and specifies SIN-regulated septum formation  
152 (17,18).

153 Here, we show that STRIPAK-directed  
154 dephosphorylation of SmKIN3 has a significant  
155 impact on proper hyphal septation and septal  
156 localization. To the best of our knowledge, this  
157 is the first report about STRIPAK-dependent  
158 phosphorylation analyzed by targeted  
159 quantification of phosphorylation sites, and will  
160 have an impact on understanding the function of  
161 mammalian homologs.

162

## 163 Results

### 164 Absolute quantification of phosphorylation 165 site occupancy by PRM of germinal centre 166 kinase SmKIN3

167 Previously, we showed that the GCKIII  
168 SmKIN3 is associated with STRIPAK and  
169 regulates fungal development (13). Sequence  
170 comparison of the primary amino acid sequence  
171 showed a homology of 92.43% with the  
172 corresponding sequence from *N. crassa*; but  
173 similarity with other homologues from  
174 ascomycetes is low. Using the eukaryotic length  
175 motif (ELM) database (19), we found a kinase  
176 domain in the amino terminus, several LATS

177 kinase recognition motifs, and a binding motif  
178 for forkhead-associated (FHA) domains. The  
179 COILS sequence analysis program  
180 ([http://www.ch.embnet.org/software/COILS\\_f](http://www.ch.embnet.org/software/COILS_f)  
181 [orm.html](http://www.ch.embnet.org/software/COILS_f)), revealed two predicted putative  
182 coiled-coil domains located next to each other  
183 in a region between amino acids 688 and 788.  
184 At the C-terminal end of SmKIN3 (amino acids  
185 805-811), we detected a conserved sequence  
186 motif, previously called T-motif (Fig. 1A). Such  
187 T-motifs have only been found so far in a small  
188 family of related fungal kinases (20). Database  
189 research revealed that a motif occurs for  
190 example in SmKIN3, its homologue Sid1p from  
191 *Schizosaccharomyces pombe* and SID-1 from  
192 *N. crassa*.

193 Recently, we determined the phosphoproteome  
194 of *S. macrospora* wild type and STRIPAK  
195 mutant strains (7,8), and detected three  
196 phosphorylation sites S589, S668 and S686 in  
197 the SmKIN3 sequence, which are conserved  
198 between *S. macrospora* and *N. crassa* (Fig. 1B).  
199 Due to its low abundance in the overall  
200 proteome, we were unable to quantify the  
201 STRIPAK-dependent phosphorylation of  
202 SmKIN3 (7,8).

203 Here, we set out to determine the impact of  
204 STRIPAK on SmKIN3 phosphorylation, by  
205 applying targeted quantification of  
206 phosphorylation site occupancy using PRM. As  
207 described above, SmKIN3, together with CDC7  
208 and DBF2 constitute the SIN complex, which is  
209 associated with the downstream landmark  
210 protein BUD4. Therefore, we included all these  
211 components in our PRM analysis.

212 A targeted bipartite TiO<sub>2</sub>-LC-PRM-based  
213 workflow was established to quantify the site-  
214 specific phosphorylation states of putative  
215 STRIPAK targets. First, 70 phosphorylated  
216 peptides and their corresponding non-  
217 phosphorylated counterparts were selected and  
218 SIS were synthesized. The median coefficient  
219 of variation (CV) of the biological replicates  
220 was calculated as 16.3% for all non-  
221 phosphorylated, and 16.1% for all  
222 phosphorylated peptides. To further prioritize  
223 our approach, we selected 15 pairs of peptides,  
224 representing phospho-sites from proteins  
225 belonging to the SIN signaling pathway.  
226 Dilution series were prepared to verify a linear  
227 response and determine the limit of detection  
228 (LOD) of each SIS peptide, as described in the  
229 Methods section. LODs ranged from 1.7 amol  
230 to 19.3 fmol per injection for phosphorylated

231 SIS peptides, and from 1.43 amol to 32.3 fmol  
232 per injection for their non-phosphorylated  
233 counterparts. The average lower limit of  
234 quantification (LLOQ) was 375 amol or  
235 135 amol on-column for phosphorylated or  
236 non-phosphorylated peptides. The median CV  
237 throughout all dilution steps was calculated as  
238 6.7% for phosphorylated, and 5.0% for non-  
239 phosphorylated peptides. These results are  
240 summarized in Supplementary data file S1.

241 *S. macrospora* wild type and the three  
242 STRIPAK deletion strains  $\Delta pro11$ ,  $\Delta pro22$  and  
243  $\Delta pp2Ac1$  were grown in triplicates prior to  
244 being subjected to lysis and protein extraction  
245 (Fig. 2). After tryptic digestion and quality  
246 control measurements, protein amounts were  
247 normalized and aliquots were spiked with either  
248 phosphorylated SIS peptides or their non-  
249 phosphorylated counterparts. The  
250 phosphopeptide aliquots were subjected to  
251 TiO<sub>2</sub>-based enrichment followed by LC-PRM  
252 measurement, while the fraction spiked with the  
253 non-phosphorylated peptides was measured  
254 directly. The targeted PRM measurements of  
255 SIS and endogenous peptides allowed the  
256 simultaneous quantification of both the  
257 phosphorylated and non-phosphorylated  
258 peptide counterparts, and thus enabled us to  
259 calculate the phosphorylation site occupancy.

260 Using the proteomics workflow described  
261 above, we were able to distinguish three  
262 different outcomes. First, we determined the site  
263 occupancy for 37 phosphorylation sites on 4  
264 proteins, where the phosphorylated and non-  
265 phosphorylated peptides were determined.  
266 Included is the phosphorylation site S686 from  
267 SmKIN3. For DBF2, we detected four  
268 phosphorylation sites of which three were  
269 quantified. Phosphorylation site S104 in DBF2  
270 was significantly decreased when STRIPAK is  
271 non-functional, indicating that this site is  
272 STRIPAK dependent. Phosphorylation of sites  
273 S89 and S502 was not differentially regulated in  
274 STRIPAK deletion mutants (Dataset S2, Fig.  
275 S1-S3). We found five phosphorylation sites in  
276 BUD4 (T381, S367, S369, S742, S1373); all  
277 were dephosphorylated in STRIPAK deletion  
278 mutants (Dataset S2, Figs. S4-S7). Secondly,  
279 nine phosphorylation sites were detected on five  
280 proteins; however, the non-phosphorylated  
281 peptide was not detectable. The  
282 phosphorylation site occupancy for these  
283 peptides was indirectly calculated based on the  
284 concentration of the remaining peptide pairs of

285 the respective protein. Among these we found  
286 two sites (S668, S589) in the SmKIN3 protein.  
287 Finally, as a third option, we found seven  
288 phosphorylation sites on five proteins, where  
289 only the phosphorylated peptides were detected  
290 and no site occupancy value could be calculated  
291 (Dataset S2). However, changes in the  
292 abundance of selected phosphorylated peptides  
293 could still be used for quantification, since the  
294 corresponding proteins were stably expressed in  
295 wild type and STRIPAK deletion mutants in  
296 previous experiments. An example is the CDC7  
297 protein, which was recently detected in a  
298 phosphoproteomic analysis (7)

299 Overall, 19 phosphorylation sites showed  
300 significantly different site occupancy between  
301 the wild type and at least one of the STRIPAK  
302 mutant strains (student's t-test p-value < 0.05;  
303 the results are summarized in Supplementary  
304 data file S2). This quantification of site  
305 occupancy helped us to prioritize our functional  
306 analyses of phosphorylation sites from  
307 SmKIN3, the main objective of this  
308 investigation. It was also the source for  
309 constructing a mechanistic model of  
310 phosphorylation-dependent protein regulation.  
311 The number of peptides where both  
312 phosphorylation sites S668 and S686 are  
313 dephosphorylated in STRIPAK deletion  
314 mutants is higher than in wild type, i.e. peptides  
315 containing phosphorylated site S668 and S686  
316 are less abundant in STRIPAK deletion mutants  
317 than in the wild type (Fig. 3). In contrast, we  
318 detected only a slightly higher number of  
319 peptides with phosphorylation at site S589 (Fig.  
320 S8).

### 321 322 **Phospho-mimetic and phospho-deficient** 323 **SmKIN3 mutants display a hyper-septation** 324 **phenotype**

325 Our quantitative analysis of the phosphosite  
326 occupancy in SmKIN3 indicated that SmKIN3  
327 is a target of STRIPAK. To analyze the function  
328 of phosphorylated SmKIN3, we generated six  
329 different phospho-deficient plus phospho-  
330 mimetic mutants, by subjecting the triplets  
331 encoding S589, S668 and S686 to *in vitro*  
332 mutagenesis, substituting the serine triplets by  
333 either alanine (no phosphorylation) or glutamic  
334 acid (mimics phosphorylation) triplets, as  
335 described in the Material and Methods section  
336 (Fig. S9). Phosphorylation of S589 is  
337 apparently STRIPAK independent (Fig. S8),

338 while S668 and S686 seem to depend on  
339 STRIPAK (Fig. 3).

340 For functional analysis of SmKIN3 and its  
341 variants, we used a previously described *Smkin3*  
342 deletion strain for complementation analysis  
343 (13). Recombinant plasmids (Table 2) encoding  
344 SmKIN3-GFP phospho-variants were  
345 transformed into  $\Delta$ SmKin3, and primary  
346 transformants were used to isolate  
347 homokaryotic ascospores. The expression of  
348 SmKIN3-GFP wild type and phospho-variants  
349 was verified by Western blot analysis indicating  
350 the expression of a 118 kDa protein (Fig. S10).  
351 When the wild type tagged *Smkin3* gene was  
352 used for complementation, we obtained fully  
353 fertile strains with wild-type mycelial growth,  
354 indicating that GFP-labeled SmKIN3 is fully  
355 functional. We then investigated three  
356 homokaryotic ascospore isolates of each  
357 phospho-mimetic strain, S589E, S668E, S686E,  
358 and phospho-deficient strain, S589A, S668A  
359 and S686A. Fluorescence microscopy showed  
360 that phospho-mutated SmKIN3 still localizes to  
361 septa and close to nuclei and thus resembles the  
362 wild type situation (Fig. S11-S17). However,  
363 we found that both S668A and S668E showed  
364 an increased number of septa in hyphal  
365 branches, as detected by GFP fluorescence of  
366 the SmKIN3-phospho variants. The identity of  
367 septa was further confirmed by Calcofluor  
368 White (CFW) staining. We investigated at least  
369 200 single hyphal branches for each strain. In  
370 these cases, 600 hyphal branches were counted  
371 for each recombinant strain (Fig. 4A-C, Dataset  
372 S3). We counted all septa within 20  $\mu$ m behind  
373 hyphal branches. Double, triple, quadruple and  
374 quintuple septa were considered when they  
375 were located within a distance of maximum  
376 12  $\mu$ m. These are referred to as hyper-septation  
377 phenotype.

378 In the case of the hyper-septation, the value for  
379 the *S. macrospora* wild type was  $1.84\% \pm 0.50$ .  
380 The hyper-septation value for the  
381 complemented strains and phospho-mutants  
382 were as follows: WT::*Smkin3-gfp*  
383  $1.00\% \pm 0.69$ ,  $\Delta$ SmKin3::*Smkin3-gfp*  
384  $3.08\% \pm 2.90$ , phospho-mutants S589A  
385  $1.04\% \pm 0.64$ , S589E  $1.44\% \pm 0.63$ , S668A  
386  $5.80\% \pm 1.69$ , S668E  $6.96\% \pm 2.53$ , S686A  
387  $4.00\% \pm 3.80$ , S686E  $3.41\% \pm 2.50$ .

388 Obviously, mutations of S668 and S686 have an  
389 effect on hyphal septation. To verify their effect  
390 further, we constructed phospho-mimetic  
391 (S668ES686E) and phospho-deficient

392 (S668AS686A) double mutants and analyzed  
393 derived ascospore isolates. The strains were  
394 fully fertile and the phospho-mutated SmKIN3  
395 proteins are still found at septa and at nuclei in  
396 young hyphae (Fig. S18-19). We determined  
397 the corresponding values for hyper-septations:  
398 S668AS686A  $7.00\% \pm 2.99$ , S668ES686E  
399  $6.84\% \pm 2.14$ . Interestingly, we detected triple,  
400 quadruple and quintuple septa only in the  
401 phosphomutants S668 and S686, and the double  
402 mutants S668S686, but they were lacking in  
403 wild type, strains complemented with the wild  
404 type gene, or phospho-mutants S589A and  
405 S589E.

406 From our quantitative results we conclude that  
407 the phospho-mimetic and phospho-deficient  
408 SmKIN3 mutations at S686 and S668 are  
409 responsible for the hyper-septation phenotype,  
410 while phosphorylation site S589 has no effect  
411 on septum formation. Interestingly, the  
412 investigated double mutants resemble mostly to  
413 mutants S668. To analyze the impact of  
414 STRIPAK on septum formation, we examined  
415 three STRIPAK deletion strains lacking either  
416 the regulatory subunit of the STRIPAK  
417 phosphatase ( $\Delta$ *Pro11*), the catalytic subunit of  
418 the STRIPAK phosphatase ( $\Delta$ *Pro2Ac1*), or the  
419 STRIP1/2 homologue ( $\Delta$ *Pro22*). We found no  
420 hyper-septation in  $\Delta$ *Pro22* and  $\Delta$ *Pro2Ac1* and  
421 only a very low number of double septa in  
422  $\Delta$ *Pro11* ( $0.8\% \pm 1.1$ ) (Fig. 4C, Fig. S20. We  
423 conclude that septum formation is reduced in  
424 STRIPAK mutants, and thus is probably  
425 positively regulated by STRIPAK.

426

#### 427 **Localization of SmKIN3 at septa is** 428 **dependent on phosphorylation and an intact** 429 **STRIPAK complex**

430 Next, we investigated the effect of  
431 phosphorylation of SmKIN3 on its cellular  
432 localization at septa. For fluorescence and  
433 differential interference microscopy we used all  
434 eight phosphorylation variants as well as the  
435 wild type and two deletion strains lacking genes  
436 for STRIPAK subunits. We selected the four  
437 terminal septa at the hyphal tip for our detailed  
438 localization analysis. We counted the first  
439 terminal septa at hyphal tips, where GFP  
440 fluorescence indicated SmKIN3 localization  
441 (representative images in Fig. 5). As an  
442 example, more than 50% of wild type septa  
443 showed fluorescence at the 3<sup>rd</sup> terminal septum  
444 (Table 1). Similar values were obtained for the

445  $\Delta$ SmKin3 strain complemented with the wild  
446 type *Smkin3* gene. However,  $\Delta$ SmKin3 strains,  
447 carrying the mutated codon S589 were  
448 different; most of the localization was observed  
449 at the 2<sup>nd</sup> and 3<sup>rd</sup> septum. A significantly  
450 different result was observed with all mutated  
451 codons S668, S686 as well as with the double  
452 mutants S668S686. Here, we found preferential  
453 localization at the first or second septum (Fig.  
454 S23).

455 To further investigate the role of STRIPAK, we  
456 analyzed the localization of SmKIN3 in two  
457 STRIPAK deletion mutants,  $\Delta$ *pro11* and  
458  $\Delta$ *pp2Ac1*. In both deletion strains, SmKIN3  
459 mainly localized at the first or second septum,  
460 similar to the phospho-variants of S668 and  
461 S686, and unlike in the wild type strain. This  
462 suggests that temporally controlled  
463 phosphorylation on sites S668 and S686 is  
464 required for the localization of SmKIN3 to early  
465 septation sites. The microscopic study was  
466 further extended by demonstrating that  
467 SmKIN3 also localized to septa in mature  
468 hyphae (Figs. S11-S17, S22-S24).

469

## 470 Discussion

471 Here, we provide analytical molecular evidence  
472 that phosphorylation of SmKIN3 at distinct  
473 sites is STRIPAK dependent. Tightly regulated  
474 phosphorylation of SmKIN3 is important for its  
475 function. Not only did we discover that  
476 deregulation of SmKIN3 phosphorylation leads  
477 to a hyper-septation phenotype, but also that  
478 temporal phosphorylation of SmKIN3 regulates  
479 its septal localization.

480 We accurately quantified 53 phosphorylated  
481 peptides, and for 37 of those directly determined  
482 the site occupancy of the phosphorylation sites  
483 by quantifying the corresponding non-  
484 phosphorylated peptide. To date, accurate  
485 targeted quantification and determination of  
486 phosphorylation site occupancy has only been  
487 performed in several studies, and these are  
488 mostly limited to just a handful of sites (11,21-  
489 24), or only used crude SIS peptides (25). Since  
490 our targeted phosphorylated peptides were  
491 found at concentrations lower than 30 amol per  
492  $\mu$ g of protein lysate, to the best of our  
493 knowledge this result confirms that we have  
494 used a most sensitive assay to determine  
495 phosphorylation site occupancy in a non-human  
496 model organism.

## 497 STRIPAK regulates SmKIN3 498 phosphorylation indirectly

499 In mammalian cells, Hippo comprises two  
500 kinases, GCK MST1/2 and NDR kinase  
501 LATS1/2 (26,27). Recently, it was shown that  
502 STRIPAK integrates upstream signals to  
503 control the activity of the SmKIN3 homolog  
504 MST1/2 for initiating Hippo signaling. Deletion  
505 of STRIP1/2, a homolog of *S. macrospora*  
506 PRO22, results in upregulation of MST1/2,  
507 which led to the conclusion that STRIPAK  
508 regulates MST1/2 (26,28,29).

509 In fungi, the Hippo homologous kinase cascade  
510 SIN comprises three kinases. For example, in  
511 *N. crassa* the Ste20 kinase CDC-7 acts  
512 upstream of GCK SID-1 and NDRK DBF-2  
513 (30). SID-1, the middle component of SIN, is  
514 the homolog of SmKIN3 and MST1/2. Our  
515 PRM analysis revealed that the phosphosite  
516 occupancy, i.e. phosphorylation in two out of  
517 three sites in SmKIN3 is decreased in  
518 STRIPAK deletion mutants. This finding is  
519 intriguing, since STRIPAK is a  
520 dephosphorylating complex. However,  
521 comparable results in fission yeast showed that  
522 SIN is negatively regulated by the SIN  
523 inhibitory PP2A (SIP) complex, the STRIPAK  
524 homolog (31). SIP dephosphorylates the  
525 upstream Ste20 kinase Cdc7p, which leads to  
526 assembly of SIN. Cdc7p itself phosphorylates  
527 SID1p, the homolog of SmKIN3. Dysfunction  
528 of SIP prevents assembly of SIN and thus  
529 abolishes phosphorylation of SID1p (31).  
530 Sid1p, SID-1 and SmKIN3 not only resemble  
531 each other in their posttranslational  
532 modifications, but also in their functions.  
533 Similar to Sid1p in *S. pombe*, SmKIN3 and SID-  
534 1 in *N. crassa* are required for proper septum  
535 formation (15,31).

## 536 The SIN component SmKIN3 is a positive 537 regulator of septum formation

538 In filamentous ascomycetes, such as  
539 *S. macrospora*, hyphae are compartmentalized  
540 by the formation of septa, which are assembled  
541 at an actomyosin-based cortical ring (CR),  
542 followed by CR constriction. The CR protein  
543 complex includes structural proteins, molecular  
544 motors, and signaling enzymes (17). Since  
545 SmKIN3 localizes at the centre of the hyphal  
546 septum around the pore, SmKIN3 may be  
547 involved in the function of CR signaling  
548 enzymes to activate or inhibit targets via  
549 posttranslational modifications, such as

550 phosphorylation. In particular, the presence of  
551 SmKIN3 at mature septa suggests additional  
552 functions besides septum formation, as was  
553 hypothesized for BUD4 (32).

554 Our PRM approach provides evidence that  
555 SmKIN3 is a dephosphorylation target of  
556 STRIPAK. The analysis of phospho-mimetic  
557 and phospho-deficient SmKIN3 expressing  
558 strains revealed a hyper-septation phenotype.  
559 Since phosphorylation at distinct SmKIN3 sites  
560 is regulated by STRIPAK, we hypothesize that  
561 the phosphorylation status of S668 and S686 is  
562 important for the temporal and spatial fine  
563 tuning of the septation process, and the correct  
564 formation of septa.

565 In *A. nidulans*, SEPH, the homolog of CDC7,  
566 has been identified as a central component for  
567 the initiation of septation prior to actin ring  
568 formation. SEPH is the upstream kinase of  
569 SEPL, which is the homolog of SmKIN3,  
570 followed by SIDB (homolog of DBF2) (Bruno  
571 et al. 2001; Kim et al. 2006). SIN and its  
572 downstream effectors are involved in forming  
573 the CR, which is responsible for initiating the  
574 formation of septa. To specify the location for  
575 septum formation, axial landmark proteins such  
576 as BUD3 and BUD4 are needed, which recruit  
577 septin AspB to the CR (17). Downregulation of  
578 SepH abolishes septation, whereas hyper-  
579 activation results in the formation of multiple  
580 septa (Bruno et al. 2001). This indicates that  
581 SEPH acts as a positive regulator of SIN, which  
582 triggers cytokinesis in *A. nidulans* (33).  
583 Comparable phenotypes were observed in  
584 *S. macrospora*, where the loss of *Smkin3* or  
585 mutation in the ATP-binding site results in the  
586 reduction of septa (13). Phosphorylation  
587 mutants of SmKIN3, as reported here, show a  
588 hyper-septation phenotype that was similarly  
589 observed in *A. nidulans* mutants with hyper-  
590 activation of SEPH. Our results are consistent  
591 with findings for *A. nidulans* and *N. crassa*,  
592 which showed that homologs of CDC7 and  
593 SmKIN3 act in the same pathway as positive  
594 regulators of SIN.

### 595 **The phosphorylation state of SmKIN3 affects** 596 **its localization**

597 Here, we demonstrate that SmKIN3's septal  
598 localization is altered in mutated phospho-  
599 deficient strains, and STRIPAK deletion  
600 mutants, indicating that this process is also  
601 mediated by STRIPAK. Furthermore, the  
602 STRIPAK-dependent phosphorylation state of

603 SmKIN3 affects its affinity for septal proteins  
604 and thus its localization. These findings are  
605 consistent with results obtained in fission yeast.  
606 There, it was shown that SIN and STRIPAK  
607 affect each other by phosphorylation and  
608 dephosphorylation (31). SIN phosphorylates  
609 GEFs and GTPases, which in turn  
610 phosphorylate the formin SepA. The  
611 phosphorylation of SepA is important for the  
612 assembly of actin to form the CR. The NDR  
613 kinase Sid2p is necessary to phosphorylate the  
614 septin Cdc12 and other proteins to form the CR  
615 (34). Such phosphorylation at the CR must be  
616 tightly regulated to form the final septum.

617 To summarize our findings, we have designed a  
618 schematic mechanistic model, as depicted in  
619 Fig. 6. The SIN complex acts downstream of  
620 STRIPAK, which dephosphorylates CDC7  
621 directly (31). However, STRIPAK acts  
622 indirectly on phosphorylation sites S668 and  
623 S686 of SmKIN3, while phosphorylation of  
624 S589 is likely regulated by an unknown  
625 phosphatase and kinase. Furthermore,  
626 STRIPAK also indirectly phosphorylates S104  
627 in DBF2, while S89 and S502 are not STRIPAK  
628 dependent. Finally, from our PRM analysis, we  
629 propose that phosphorylation of all sites from  
630 BUD4 depends on STRIPAK.

631 We hypothesize further that deletion of  
632 STRIPAK subunits results in higher  
633 phosphorylation of CDC7, which prevents  
634 assembly of SIN (Singh et al. 2011). This results  
635 in a lower level of phosphorylated SmKIN3,  
636 which consequently is unable to phosphorylate  
637 the downstream kinase DBF2. Subsequently,  
638 DBF2 does not phosphorylate the anillin-like  
639 protein BUD4 to form the CR, leading to lower  
640 septation. Indeed, our quantitative  
641 phosphorylation data provide evidence that four  
642 phosphorylation sites of BUD4 and the  
643 phosphorylation site S104 of DBF2 are  
644 dephosphorylated in STRIPAK deletion  
645 mutants compared to wild type. The  
646 phosphorylation site S502 of DBF2, which is  
647 the homolog to the phosphorylation site S499 in  
648 *N. crassa*, is not regulated by STRIPAK  
649 (Supplementary data S2). This is consistent  
650 with results obtained in *A. nidulans*. There,  
651 localization of septin AspB, which is the  
652 homolog of CDC12 in *S. macrospora*, is  
653 dependent on the formin SepA (SMAC\_04496),  
654 the SIN kinase SepH (CDC7), and on its own  
655 phosphorylation state.

656 Dephosphorylation of conserved threonine 68  
657 in SepH was shown to be critical for timing of  
658 septation and localization (35,36). In *N. crassa*,  
659 phosphorylation analysis revealed that  
660 phosphorylation of DBF-2 is stimulated by  
661 SID-1. Interestingly, phospho-deficient and  
662 phospho-mimetic mutants of DBF-2  
663 phosphorylation site S499 in *N. crassa* are  
664 nonfunctional *in vivo* and reduce the kinase  
665 activity of DBF-2 *in vitro* (15). However, our  
666 data indicate that S499 (S502 in *S. macrospora*)  
667 seems not to be regulated by STRIPAK, but is  
668 essential in septum formation.

669 The interaction between components of the SIN  
670 cascade is decreased when their  
671 dephosphorylation is diminished due to a non-  
672 functional STRIPAK complex. Moreover, the  
673 lack of SIN phosphorylation prevents the  
674 recruitment of SIN components to septal pore  
675 proteins at the hyphal tip (37). Thus, the  
676 interaction of SmKIN3 with SIN and STRIPAK  
677 has to be strongly regulated to form septa in a  
678 wild type-like manner, as suggested by our  
679 localization experiments with wild type and  
680 mutant strains.

681 SmKIN3 homologs are conserved from yeast to  
682 humans, and SIN-like pathways have been  
683 mentioned in this discussion. We propose that  
684 the mechanism of SmKIN3 function described  
685 in this study may be applicable to that of  
686 homologous networks in other organisms.

687

## 688 **Experimental procedures**

### 689 **Strains and growth conditions**

690 Electro-competent *E. coli* cells XL1 Blue MRF'  
691 were used for cloning and propagation of  
692 recombinant plasmids (38) under standard  
693 laboratory conditions (39). All *S. macrospora*  
694 strains used in this study are listed in Table S1  
695 and were grown under standard conditions  
696 (40,41). For analysis of distribution, SmKIN3  
697 strains were grown for 24 h on solid biomalt-  
698 cornmeal medium (BMM)-coated glass.  
699 Isogenic and homokaryotic strains were  
700 generated by genetic crossing and ascospore  
701 isolation (40). To obtain phospho-mutants, the  
702 mutated plasmids (Table S2) were transformed  
703 into a  $\Delta Smkin3$  strain. Phospho-mutations in the  
704 generated strains were verified by PCR analysis  
705 and DNA sequencing (Eurofins Genomics;  
706 Ebersberg, Germany). The number of  
707 ectopically integrated recombinant DNA

708 fragments was verified by Southern  
709 hybridization analysis (Fig. S24).

### 710 ***In vitro* recombinant techniques**

711 Plasmids used in this study are listed in  
712 Table S2. pIG1783-*Smkin3-gfp* was created by  
713 restricting the plasmid pIG1783 with *NcoI*.  
714 *Smkin3* was amplified via PCR with overhangs  
715 at the 5' and 3' ends containing recognition sites  
716 for *NcoI*. Ligation was performed with T4 DNA  
717 ligase. For phospho-mimetic and phospho-  
718 deficient strains, plasmid pIG1783-*Smkin3-gfp*  
719 was used for Q5 mutagenesis (NEB biolabs).  
720 With specific primers (Table S3), we generated  
721 eight plasmids, containing phospho-mimetic  
722 and phospho-deficient mutations (Fig. S3)

723 **Microscopic investigations.** Microscopic  
724 experiments were performed using an  
725 AxioImager microscope (Zeiss [Carl Zeiss],  
726 Thornwood, NY) coupled with a CoolSnap HQ  
727 camera (Roper Scientific) and a SpectraX LED  
728 lamp (Lumencor) at room temperature. Images  
729 were acquired and edited with MetaMorph  
730 (version 7.7.0.0; Universal Imaging). Strains  
731 were grown on glass slides covered with solid  
732 BMM and incubated for 12 to 24 hours. Co-  
733 localization of proteins was obtained by  
734 inoculating two different strains on the same  
735 BMM-coated glass slides in Petri dishes for 1 to  
736 2 days. Hyphal fusion of both strains enabled  
737 the formation of heterokaryons by exchanging  
738 nuclei. GFP fluorescence and mRFP  
739 fluorescence were analyzed using filter sets  
740 (Chroma Technology Corp.) 49002 (GFP,  
741 excitation filter HQ470/40, emission filter  
742 HQ525/50, beamsplitter T495LPXR) and  
743 49008 (mRFP, excitation filter HQ560/40,  
744 emission filter ET630/75m, beamsplitter  
745 T585lp). Septa in vegetative hyphae and  
746 ascogonial coils were stained using Calcofluor  
747 White M2R (CFW; Sigma [Sigma Chemical],  
748 St. Louis, MO) with a concentration of 1  $\mu$ g/ml  
749 CFW stock solution diluted 1:400 in A. dest  
750 solution. CFW fluorescence was analyzed using  
751 Chroma filter set 31000v2 (excitation filter  
752 D350/50, emission filter D460/50, beam splitter  
753 400dclp; Chroma Technology Corp., Bellows  
754 Falls, VT, USA).

755 To analyze the distribution of SmKIN3 on  
756 septa, 50 to 100 hyphal tips of the growing front  
757 were observed in 10 to 15 independent samples  
758 per strain in three different independent strains.  
759 Septal distances in hyphae were measured using  
760 MetaMorph (version 6.3.1; Universal Imaging).  
761 For analysis of hyper-septation, e.g. double and



762 triple septa, we investigated at least 100 single  
763 hyphal branches for each strain. In the case of  
764 recombinant strains, three different single  
765 ascospore isolates were investigated to exclude  
766 side effects from random integration of  
767 recombinant DNA. In these cases, 600 hyphal  
768 branches were counted for each recombinant  
769 strain.

#### 770 **Peptide selection for targeted quantification** 771 **of phosphorylation sites**

772

773 Based on the results of the global ITRAQ-based  
774 (phospho-)proteomic analyses previously  
775 performed (7,8), as well as unpublished work,  
776 phosphorylated peptides that showed  
777 differential regulation in STRIPAK mutant  
778 strains compared to wild type were selected and  
779 identified as putative dephosphorylation targets  
780 of the STRIPAK complex. In addition, the  
781 corresponding non-phosphorylated peptides  
782 were selected for quantification, thus enabling  
783 calculation of a site-occupancy value for the  
784 respective phosphorylation sites. As controls,  
785 phosphopeptides representing cell division  
786 control protein 48 (CDC48; SMAC\_00109) and  
787 heat shock protein 90 (HSP90; SMAC\_04445)  
788 were included (Figs. S25-S28), since they  
789 showed no regulation in the global experiments,  
790 and to our knowledge are not functionally  
791 connected to the STRIPAK complex.

792

#### 793 **Synthesis, purification and quantification of** 794 **SIS peptides**

795 Synthesis of all SIS peptides was performed in-  
796 house using a Syro I synthesis unit  
797 (MultiSynTech, Witten, Germany) and Fmoc  
798 chemistry. Synthesis and subsequent  
799 purification were performed as described  
800 previously (42). Heavy-labeled lysine ( $^{13}\text{C}_6$   
801  $^{15}\text{N}_2$ ) and arginine ( $^{13}\text{C}_6$   $^{15}\text{N}_4$ ) were incorporated  
802 at the C-terminus, and amino acid analysis was  
803 applied to determine peptide concentrations  
804 (43). A five-point calibration curve of  
805 derivatized amino acids, ranging from  
806 5-25 pmol/ $\mu\text{L}$ , was used for quantification.

807 Protein extraction, digestion and normalization  
808 and phosphopeptide enrichment were  
809 performed as recently reported (7).

#### 810 **nano-LC-MS/MS for PRM of** 811 **unphosphorylated peptides**

812 Samples were analyzed on an Ultimate 3000  
813 nanoRSLC HPLC system coupled to a  
814 Q Exactive HF mass spectrometer (MS, both  
815 Thermo Scientific). The HPLC was equipped  
816 with a trapping column (100  $\mu\text{m}$  x 2 cm C18,  
817 PepMap RSLC, Thermo Scientific) for pre-  
818 concentration, and an analytical column (75  $\mu\text{m}$   
819 x 50 cm C18, PepMap RSLC, Thermo  
820 Scientific) for separation of the peptides. Pre-  
821 concentration was performed for 5 min at a flow  
822 rate of 20  $\mu\text{L}/\text{min}$  using 0.1% TFA, and  
823 separation was performed at a flow rate of 250  
824 nL/min. An optimized binary gradient of  
825 solvent A (0.1% FA) and solvent B (84%  
826 acetonitrile, 0.1% FA) was used with the  
827 following steps: 0 min – 2%B; 5 min – 2%B;  
828 10 min – 5%B; 50 min – 9%B; 73 min – 15%B;  
829 100 min – 21%B; 115 min – 45%B, followed by  
830 two washing steps for 5 min at 95%B and  
831 20 min of equilibration at 2%B. The MS was  
832 operated in PRM mode at a resolution of 60,000  
833 (at 200 m/z) with a fixed first mass of 150 m/z.  
834 The AGC target was set to  $1 \times 10^6$  and a  
835 maximum injection time of 118 ms. Targeted  
836 precursors were isolated with a quadrupole  
837 isolation width of 0.4 m/z and fragmented with  
838 a normalized collision energy of 27. PRM  
839 acquisition was scheduled with a retention-time  
840 window of 2 min per target.

#### 841 **nano-LC-MS/MS for PRM of** 842 **phosphorylated peptides**

843 Enriched phosphorylated peptides were  
844 analyzed with the same instrumentation and  
845 settings as described above. The LC gradient  
846 was optimized to suit the targeted  
847 phosphopeptides and the steps were modified as  
848 follows: 0 min – 3%B; 5 min – 3%B; 15 min –  
849 7%B; 37 min – 10%B; 90 min – 20%B;  
850 110 min – 27%B; 120 min – 45%B, followed by  
851 the same washing and equilibration steps as  
852 above.

#### 853 **PRM development and analysis**

854 To verify the linearity of response and  
855 determine the limit of blank (LOB), LOD, and  
856 LLOQ response curves of both phosphorylated  
857 and non-phosphorylated SIS peptides were  
858 acquired. In both cases, a background matrix  
859 was generated by pooling aliquots of all  
860 individual samples. SIS peptides were spiked in  
861 at 8 different concentrations, covering a range  
862 of three orders of magnitude. Based on prior  
863 determination of individual SIS response  
864 factors, the highest concentrations for non-  
865 phosphorylated SIS peptides varied between

866 54 fmol and 2.73 pmol on-column, while the  
867 lowest concentrations were between 13 and  
868 667 amol on-column. For the analysis of the  
869 individual samples, a total amount of non-  
870 phosphorylated SIS peptides ranging from  
871 0.05 fmol to 60 fmol was spiked into 3 µg of  
872 total protein digest, depending on the expected  
873 endogenous concentration (all concentrations  
874 are given in Supplementary data file S1).  
875 For phosphorylated SIS peptide calibration  
876 curve measurements, a total of 8 dilution points  
877 were generated with SIS peptide concentrations  
878 ranging from 600 amol to 2.4 pmol in 200 µg of  
879 background matrix for the best responding  
880 peptides, as detailed in supplementary data file  
881 S1.  
882 In addition, six phosphoisomeric standard  
883 isotope-labeled (SIL) peptides were included in  
884 the assay, but no endogenous peptide was  
885 detected. These peptides could be further used  
886 to rule out the presence of these isomers through  
887 knowledge of their retention time and  
888 diagnostic transitions. The median CV of the  
889 biological replicates was calculated as 16.3%  
890 for all non-phosphorylated and 16.1% for all  
891 phosphorylated peptides. The lowest average  
892 site occupancy was detected at 0.06% on S369  
893 in the HSP 90 protein SMAC\_04445. This site  
894 was included as negative control and its  
895 occupancy showed no significant difference  
896 between the wild type and any of the deletion  
897 strains. The phosphorylation site S2349 in the  
898 phosphatidylinositol 3-kinase TOR2  
899 (SMAC\_03322) exhibited the highest site  
900 occupancy with 92.2% measured in the wild  
901 type.

902 All calibration curve samples were subjected to  
903 TiO<sub>2</sub>-based phosphopeptide enrichment and  
904 nano-LC-MS/MS measurement in technical

905 triplicates (16.7% of eluate per replicate) as  
906 detailed above. Additionally, two replicates  
907 without SIS spike-in (DS0) were processed in  
908 parallel to appropriately determine background  
909 signal levels. For the final analysis of individual  
910 samples, a total amount of 410 amol to 4.1 fmol  
911 was spiked into 450 µg of protein digest,  
912 followed by phosphopeptide enrichment and  
913 nano-LC-MS/MS measurement of 25% of the  
914 eluates after enrichment.

915 Skyline software (version 4.1, (44)) was used to  
916 analyze all of the PRM data. The top 3 most  
917 suitable transitions of every light and SIS  
918 peptide pair were chosen. All data were  
919 manually inspected for correct peak detection,  
920 retention time and integration, and peak areas  
921 were exported. R software (45) (version 3.5.3)  
922 was used for data analysis and calibration curve  
923 measurements, and LOB and LOD were  
924 calculated using the MSSStats package (46). The  
925 L/H peak area ratios were used to determine the  
926 concentration (c) of phosphorylated and non-  
927 phosphorylated peptide per sample. The  
928 phosphorylation site occupancy was calculated  
929 using the following formula:

$$930 \frac{c(\text{phosphorylated peptide})}{c(\text{phosphorylated peptide}) + c(\text{non-phosphorylated peptide})} * 100 = \text{site occupancy (\%)}.$$

931 Statistical comparison of the phosphorylation  
932 site occupancy between wild type and knock-  
933 out strains was performed using a two-sided  
934 student's t-test.  
935

#### 937 **Data availability**

938 All targeted proteomics data and raw files are  
939 available through the Panorama repository (47)  
940 with the dataset identifier PXD023130 and via  
941 <https://panoramaweb.org/SmKIN3.url>

942

943 **Acknowledgements**

944 We thank Ingeborg Godehardt and Susanne Schlewinski for superb technical help, and Varvara  
945 Solovyeva for help during her Bachelor thesis.

946 **Funding and additional information**

947 VS receives a stipend from the Studienstiftung des Deutschen Volkes (German Academic Scholarship  
948 Foundation, Bonn Bad-Godesberg, Germany). This study was funded by the German Research  
949 Foundation (DFG) (Bonn Bad-Godesberg, Germany) (KU517/16-1, KU517/16-2, SI835/6-1, SI835/8-  
950 2).

951 **Conflict of Interest:** The authors declare no conflicts of interest in regards to this manuscript.

952 **Abbreviations**-The abbreviations used are: BMM, biomalt-cornmeal medium; CFW, Calcofluor White;  
953 CR, cortical ring; CV, coefficient of variation; ELM, eukaryotic length motif; FHA, forkhead-  
954 associated; GCK, germinal centre kinase; iTRAQ, isobaric Tags for Relative and Absolute Quantitation;  
955 LFQ, label-free quantification; LLOQ, lower limit of quantification; LOB, limit of blank; LOD, limit of  
956 detection; NDR, nuclear DBF2-related; PRM, parallel reaction monitoring; SIL, standard isotope  
957 labeled; SIN, septation initiation network; SIP, SIN inhibitory PP2A; SIS, stable isotope-labeled  
958 standards; STRIPAK, striatin-interacting phosphatase and kinase; TMT, tandem mass tag

959

960

961 **Table 1: Localization of SmKIN3, and its phosphorylation variants in wild type and STRIPAK**  
 962 **deletion strains.** In wild type, SmKIN3 is preferentially seen at the third terminal septum, while in the  
 963 three variants S668, S686 and S668S686, and both STRIPAK mutants  $\Delta pp2Ac1$  and  $\Delta pro11$ ,  
 964 localization is observed mostly at the first or second septum.  $N \geq 50$  per strain. Localization of SmKIN3  
 965 in the complemented  $\Delta SmKin3$  strain and in both phospho-variants of S589 resembles the wild type.

|                             | 1 <sup>st</sup> septum | 2 <sup>nd</sup> septum | 3 <sup>rd</sup> septum | 4 <sup>th</sup> septum |
|-----------------------------|------------------------|------------------------|------------------------|------------------------|
| WT::kin3-gfp*               | -                      | 30.93%                 | 51.55%                 | 13.40%                 |
| $\Delta kin3::kin3-gfp$     | -                      | 22.00%                 | 64.00%                 | 14.00%                 |
| S589A                       | 3.96%                  | 47.52%                 | 46.53%                 | 1.98%                  |
| S589E                       | -                      | 43.84%                 | 46.58%                 | 9.59%                  |
| S668A                       | 53.48%                 | 46.51%                 | -                      | -                      |
| S668E                       | 27.42%                 | 67.74%                 | 4.83%                  | -                      |
| S686A                       | 52.63%                 | 47.37%                 | -                      | -                      |
| S686E                       | 44.78%                 | 47.76%                 | 7.46%                  | -                      |
| S668AS686A                  | 26.79%                 | 64.29%                 | 8.92%                  | -                      |
| S668ES686E                  | 39.29%                 | 53.57%                 | 7.14%                  | -                      |
| $\Delta pro11::kin3-gfp^*$  | 68.00%                 | 32.00%                 | -                      | -                      |
| $\Delta pp2Ac1::kin3-gfp^*$ | 84.00%                 | 16.00%                 | -                      | -                      |

966 \* strains are isogenic

967

968

969

970

971

972

973

974

975

976

977

978

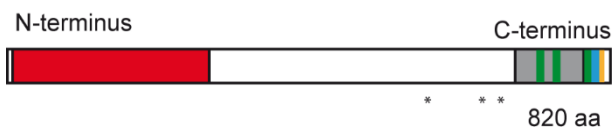

979

980 **Figure 1: Linear structure of SmKIN3 and identified protein domains.** Depicted are a  
 981 serine/threonine kinase domain (aa 10-279, red), large tumor suppressor kinase 1 (LATS1) kinase  
 982 phosphorylation motifs (aa 721-727; 740-746; 794-800, green), a coiled-coil domain (aa 688-788, grey),  
 983 a T-motif (aa 801-806, blue), and a phospho-threonine motif, binding a subset of FHA domains (aa 805-  
 984 811, yellow). Asterisks below indicate phosphorylation sites S589, S668, and S686.

985

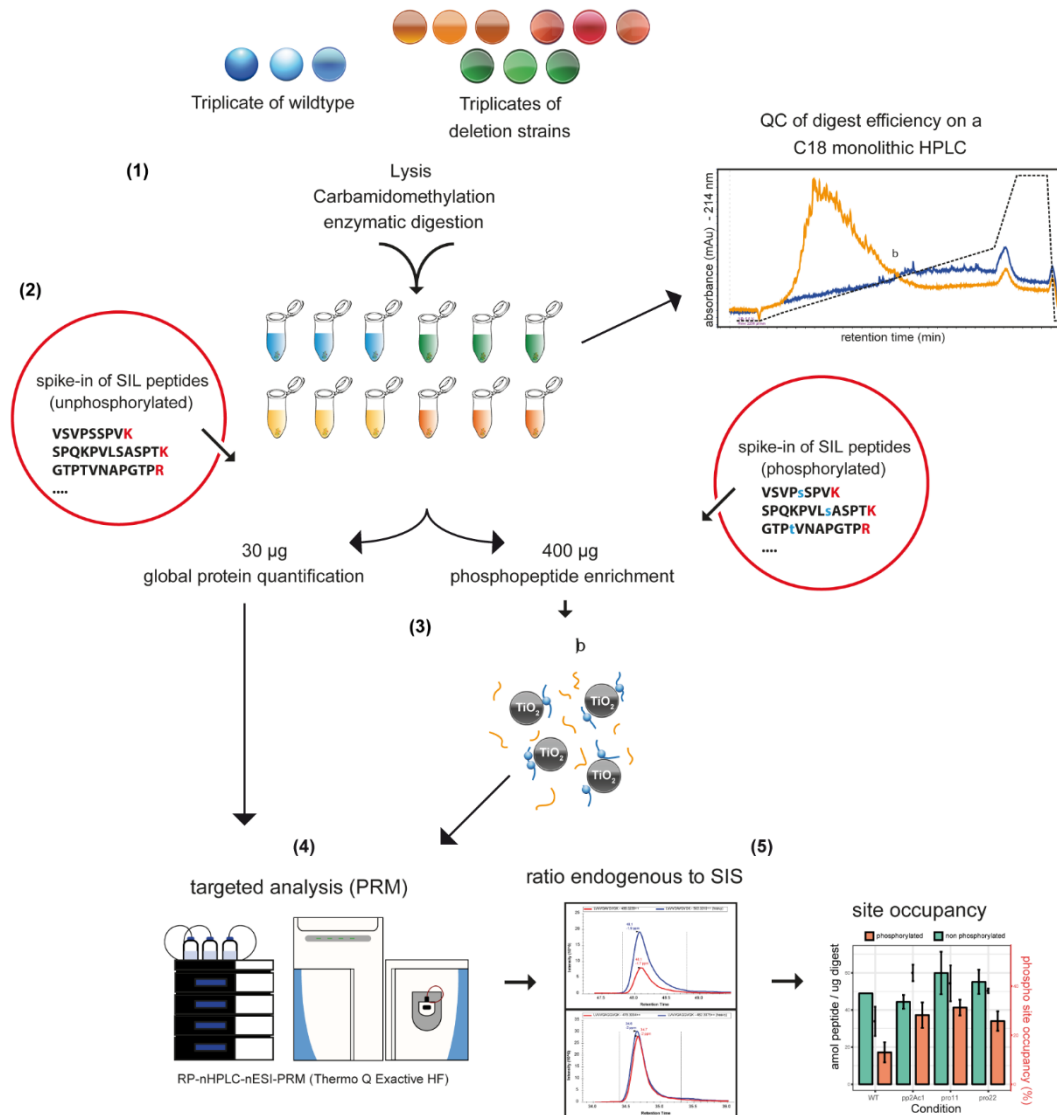

986

987 **Figure 2: Targeted quantification of phosphorylation site occupancy.** Graphical representation of  
 988 the proteomics workflow including (1) extraction and digestion of proteins from *S. macrospora* strains  
 989 grown in triplicates, (2) spike-in of phosphorylated and unphosphorylated SIS peptides, (3) TiO<sub>2</sub>-based  
 990 enrichment of phosphorylated peptides, (4) targeted analysis using a RP-nHPLC-nESI-PRM setup, and  
 991 (5) data analysis and calculation of phosphorylation site occupancy.

992

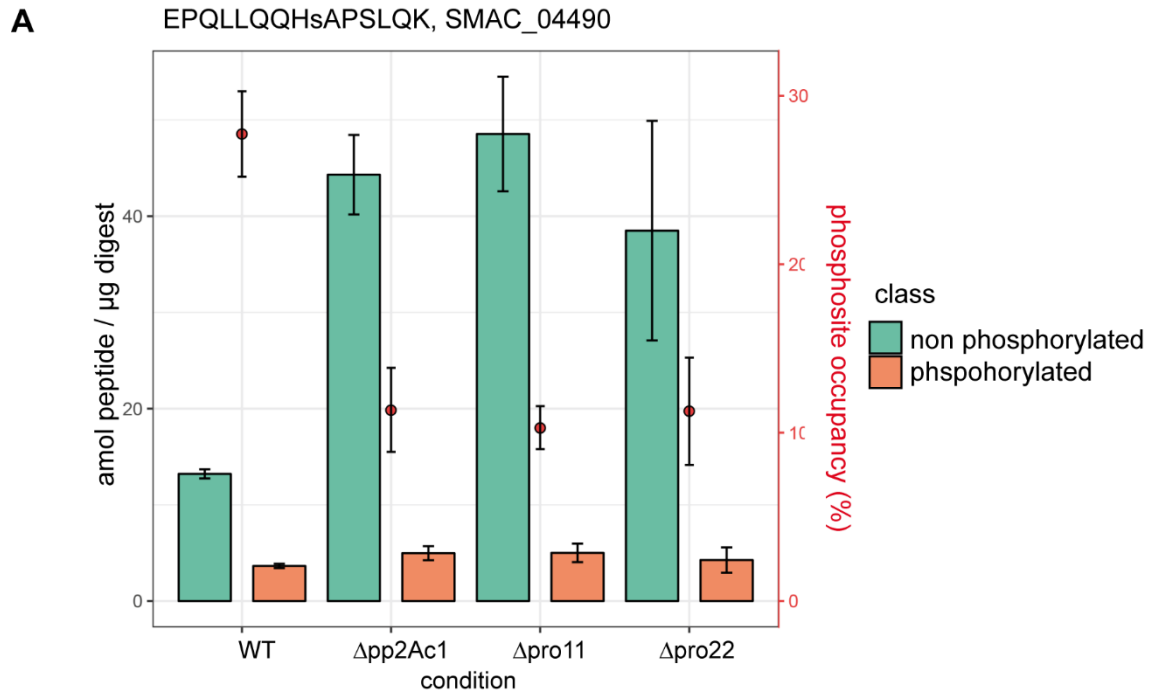

**B** S668

*S.m.* SPQKKEPQLLQQHsAPSLQKKNP  
*N.c.* SPQKKEPQLLQQHsAPLQKKNP

993

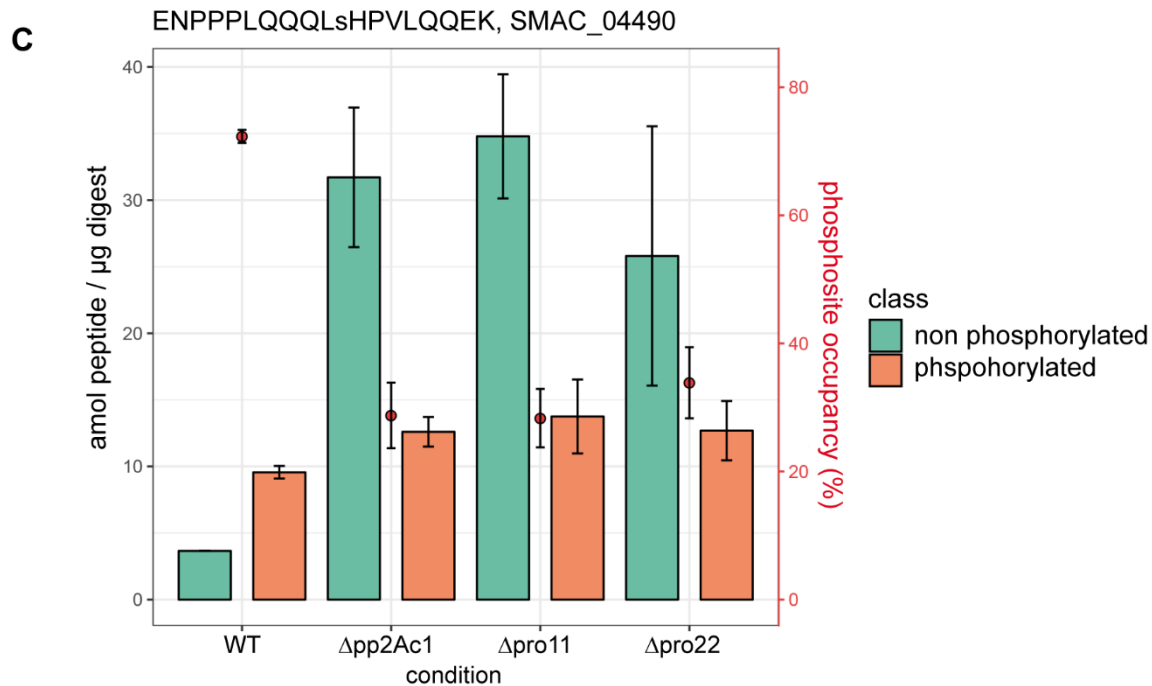

**D** S686

*S.m.* LQQQLsHPVLQQEKQRREASSQQL  
*N.c.* LQQQLsHPVLQQEKQRRETSSQQL

994

995 **Figure 3: Quantitative analysis of the non-phosphorylated and phosphorylated peptides**  
 996 **containing phosphorylation site S668 and S686 of SmKIN3 in three different STIPAK deletion**  
 997 **mutants.** (A, C) The y-axis on the left gives the amount of the peptides EPQLLQQHsAPSLQK or  
 998 ENPPPLQQQLHsHPVLQQEK in amol as non-phosphorylated (green) and phosphorylated variants  
 999 (orange). The y-axis on the right shows the quantity of phosphosite occupancy in percent, plotted as red

1000 dots in the bar chart. Error bars indicate standard deviation. Lower case letters in the peptides indicate  
1001 the phosphosite. (B, D) Alignment of sequences of SmKIN3 from *S. macrospora* (*S.m.*), and SID-1 from  
1002 *Neurospora crassa* (*N.c.*).  
1003

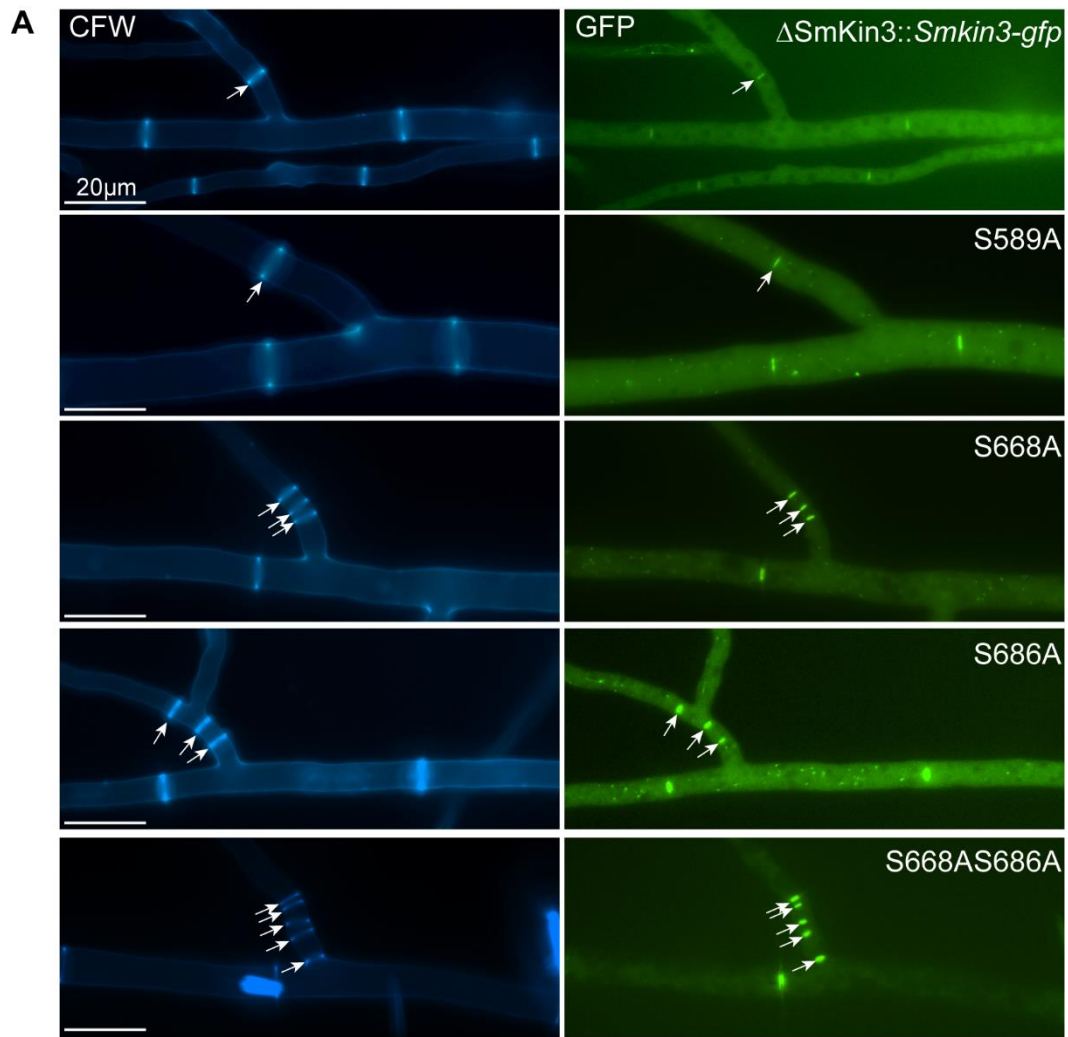

1004

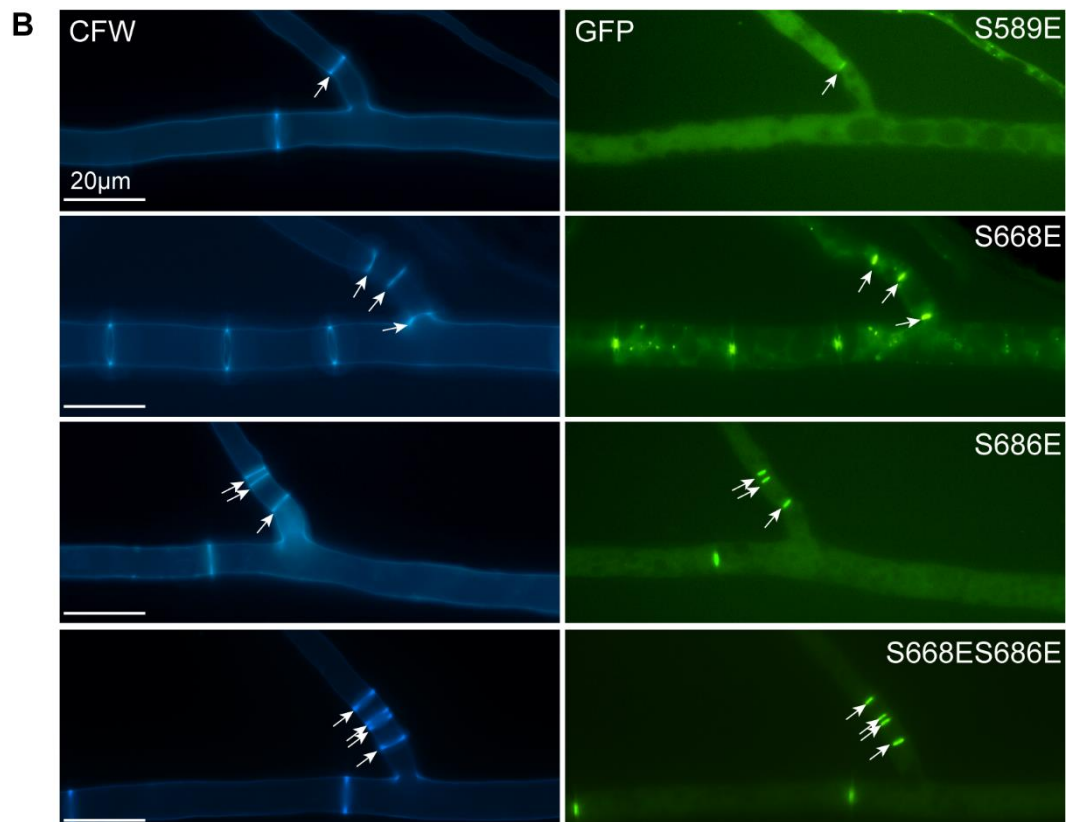

1005



C

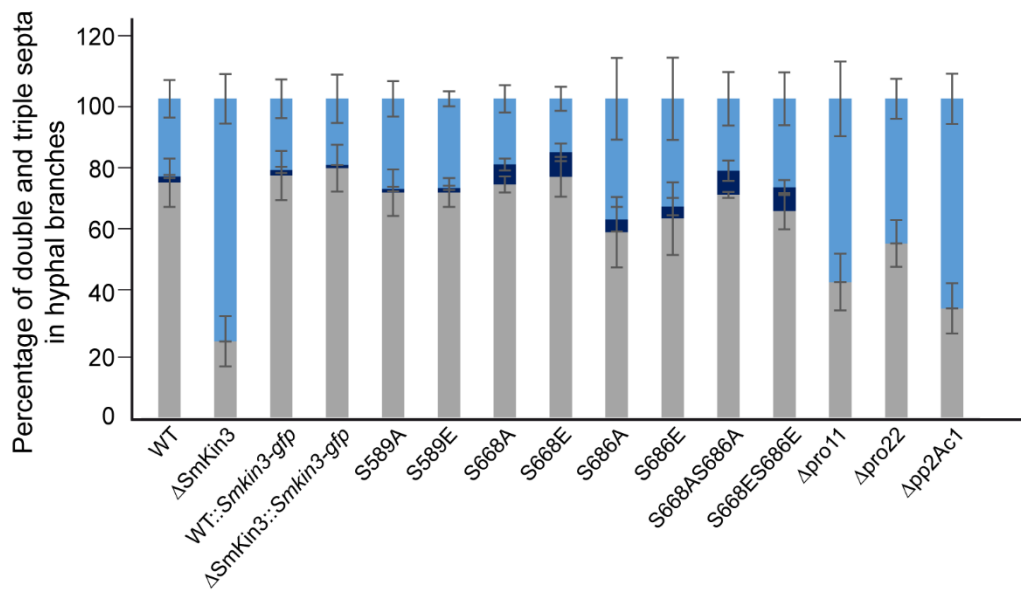

1006

1007 **Fig. 4: Hyper-septation phenotype in wild type and phospho-mutants.** (A) Fluorescence  
1008 microscopic investigation of septation at hyphal branches. Mycelia were stained with CFW, and  
1009 SmKIN3 is labeled with GFP. (B) Quantitative investigation of hyper-septation. All values are given in  
1010 percent. We investigated at least 100 hyphal branches for each STRIAPK mutant strain. In the case of  
1011 recombinant strains, three different single ascospore isolates were investigated to exclude side effects  
1012 from random integration of recombinant DNA into genomic DNA. In these cases, 600 hyphal branches  
1013 were counted for each recombinant strain. As a control, 600 hyphae from ΔSmKin3 complemented with  
1014 wild type, and ΔSmKin3 strains were investigated in 3 technical replicates. Percentage of hyperseptation  
1015 (2-5 septa) are given in dark blue, no septa are indicated in light blue. Error bars indicate standard  
1016 deviations.

1017

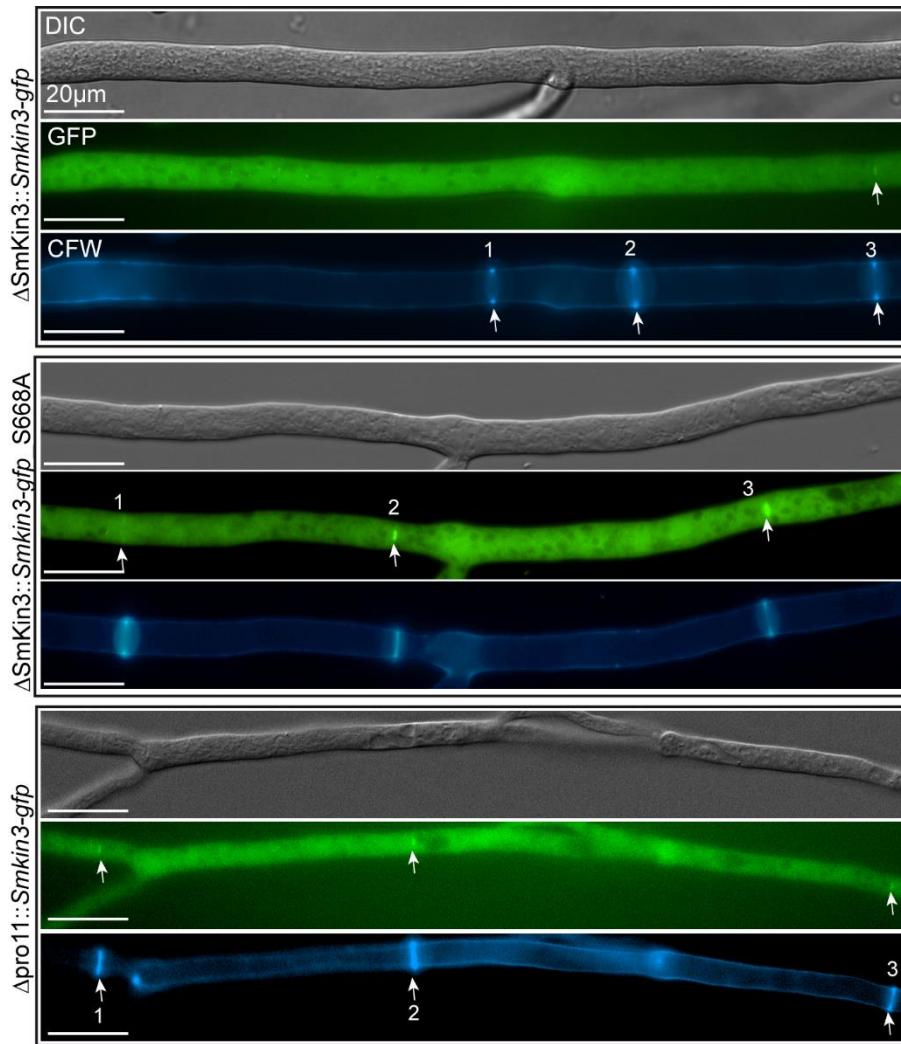

1018

1019 **Fig. 5: STRIPAK-dependent localization of SmKIN3-GFP at hyphal septa.** The strains shown here  
1020 are indicated on the left. The first three septa from the hyphal tip (on the left) were numbered.  
1021 Arrowheads label green fluorescing SmKIN3 (GFP), or CFW stained septa.

1022

1023

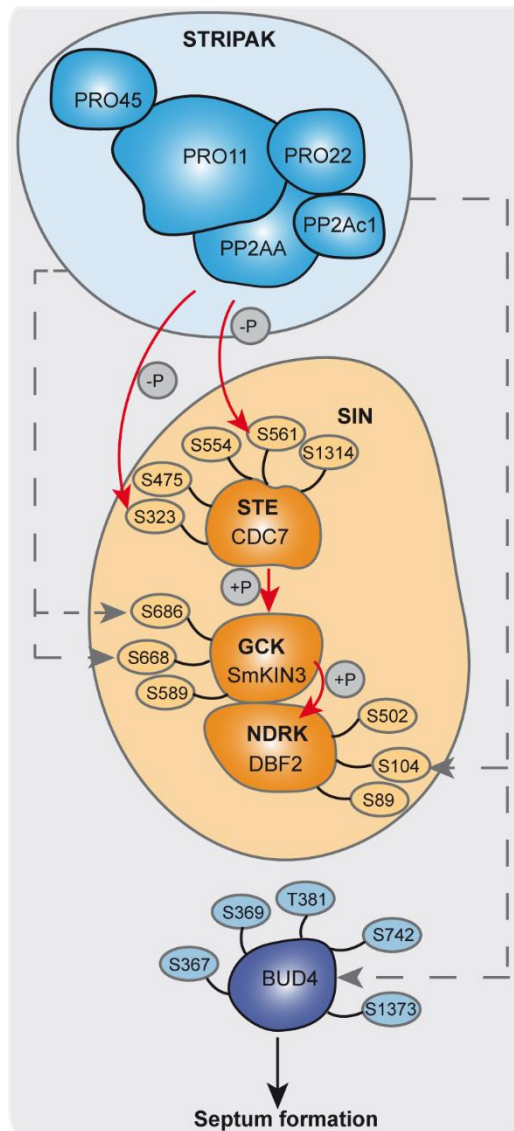

1024

1025 **Figure 6: Mechanistic model of STRIPAK-dependent phosphorylation of SmKIN3, as part of the**  
1026 **SIN complex.** Relevant phosphorylation sites in SIN components and the related BUD4 protein are  
1027 indicated around the proteins. STRIPAK subunits are colored in blue, SIN components are colored in  
1028 orange. Grey dashed arrows indicate STRIPAK regulated phosphorylation. Red arrows indicate direct  
1029 phosphorylation. This model is based on data from this study, and from a recent publication (7)

1030

1031

1032 **References**

- 1033 1. Hwang, J., and Pallas, D. C. (2014) STRIPAK complexes: structure, biological function, and  
1034 involvement in human diseases. *Int J Biochem Cell Biol.* **47**, 118-148
- 1035 2. Shi, Z., Jiao, S., and Zhou, Z. (2016) STRIPAK complexes in cell signaling and cancer. *Oncogene.*  
1036 **35**, 4549-4557
- 1037 3. Gundogdu, R., and Hergovich, A. (2019) MOB (Mps one Binder) proteins in the Hippo  
1038 pathway and cancer. *Cells.* **8**
- 1039 4. Kück, U., Radchenko, D., and Teichert, I. (2019) STRIPAK, a highly conserved signaling  
1040 complex, controls multiple eukaryotic cellular and developmental processes and is linked  
1041 with human diseases. *Biol Chem.* **400**, 1005-1022
- 1042 5. Roche, C. M., Loros, J. J., McCluskey, K., and Glass, N. L. (2014) *Neurospora crassa*: looking  
1043 back and looking forward at a model microbe. *Am J Bot.* **101**, 2022-2035
- 1044 6. Hogrebe, A., von Stechow, L., Bekker-Jensen, D. B., Weinert, B. T., Kelstrup, C. D., and Olsen,  
1045 J. V. (2018) Benchmarking common quantification strategies for large-scale  
1046 phosphoproteomics. *Nat Commun.* **9**, 1045
- 1047 7. Märker, R., Blank-Landeshammer, B., Beier-Rosberger, A., Sickmann, A., and Kück, U. (2020)  
1048 Phosphoproteomic analysis of STRIPAK mutants identifies a conserved serine  
1049 phosphorylation site in PAK kinase CLA4 to be important in fungal sexual development and  
1050 polarized growth. *Mol Microbiol.* **113**, 1053-1069
- 1051 8. Stein, V., Blank-Landeshammer, B., Müntjes, K., Märker, R., Teichert, I., Feldbrügge, M.,  
1052 Sickmann, A., and Kück, U. (2020) The STRIPAK signaling complex regulates  
1053 dephosphorylation of GUL1, an RNA-binding protein that shuttles on endosomes. *PLoS*  
1054 *Genet.* **16**, e1008819
- 1055 9. Marx, V. (2013) Targeted proteomics. *Nat Methods.* **10**, 19-22
- 1056 10. Wu, R., Dephoure, N., Haas, W., Huttlin, E. L., Zhai, B., Sowa, M. E., and Gygi, S. P. (2011)  
1057 Correct interpretation of comprehensive phosphorylation dynamics requires normalization  
1058 by protein expression changes. *Mol Cell Proteomics.* **10**, M111 009654
- 1059 11. Dekker, L. J. M., Zeneyedpour, L., Snoeijers, S., Joore, J., Leenstra, S., and Luider, T. M. (2018)  
1060 Determination of site-specific phosphorylation ratios in proteins with targeted mass  
1061 spectrometry. *J Proteome Res.* **17**, 1654-1663
- 1062 12. Prus, G., Hoegl, A., Weinert, B. T., and Choudhary, C. (2019) Analysis and interpretation of  
1063 protein post-translational modification site stoichiometry. *Trends in Biochemical Sciences.* **44**,  
1064 943-960
- 1065 13. Radchenko, D., Teichert, I., Pöggeler, S., and Kück, U. (2018) A Hippo pathway-related GCK  
1066 controls both sexual and vegetative developmental processes in the fungus *Sordaria*  
1067 *macrospora*. *Genetics.* **210**, 137-153
- 1068 14. Simanis, V. (2015) *Pombe's* thirteen - control of fission yeast cell division by the septation  
1069 initiation network. *J Cell Sci.* **128**, 1465-1474
- 1070 15. Heilig, Y., Schmitt, K., and Seiler, S. (2013) Phospho-regulation of the *Neurospora crassa*  
1071 septation initiation network. *PLoS One.* **8**, e79464
- 1072 16. Guertin, D. A., Chang, L., Irshad, F., Gould, K. L., and McCollum, D. (2000) The role of the  
1073 *sid1p* kinase and *cdc14p* in regulating the onset of cytokinesis in fission yeast. *EMBO J.* **19**,  
1074 1803-1815
- 1075 17. Si, H., Rittenour, W. R., Xu, K., Nicksarlian, M., Calvo, A. M., and Harris, S. D. (2012)  
1076 Morphogenetic and developmental functions of the *Aspergillus nidulans* homologues of the  
1077 yeast bud site selection proteins Bud4 and Axl2. *Mol Microbiol.* **85**, 252-270
- 1078 18. Wu, H., Guo, J., Zhou, Y. T., and Gao, X. D. (2015) The anillin-related region of Bud4 is the  
1079 major functional determinant for Bud4's function in septin organization during bud growth  
1080 and axial bud site selection in budding yeast. *Eukaryot Cell.* **14**, 241-251
- 1081 19. Gouw, M., Michael, S., Samano-Sanchez, H., Kumar, M., Zeke, A., Lang, B., Bely, B., Chemes,  
1082 L. B., Davey, N. E., Deng, Z., Diella, F., Gurth, C. M., Huber, A. K., Kleinsorg, S., Schlegel, L. S.,

- 1083 Palopoli, N., Roey, K. V., Altenberg, B., Remenyi, A., Dinkel, H., and Gibson, T. J. (2018) The  
1084 eukaryotic linear motif resource - 2018 update. *Nucleic Acids Res.* **46**, D428-D434
- 1085 20. Sandrock, B., Böhmer, C., and Bölker, M. (2006) Dual function of the germinal centre kinase  
1086 Don3 during mitosis and cytokinesis in *Ustilago maydis*. *Mol Microbiol.* **62**, 655-666
- 1087 21. Mayya, V., Rezual, K., Wu, L., Fong, M. B., and Han, D. K. (2006) Absolute quantification of  
1088 multisite phosphorylation by selective reaction monitoring mass spectrometry:  
1089 determination of inhibitory phosphorylation status of cyclin-dependent kinases. *Mol Cell*  
1090 *Proteomics.* **5**, 1146-1157
- 1091 22. Schulze, W. X., Schneider, T., Starck, S., Martinoia, E., and Trentmann, O. (2012) Cold  
1092 acclimation induces changes in *Arabidopsis* tonoplast protein abundance and activity and  
1093 alters phosphorylation of tonoplast monosaccharide transporters. *Plant J.* **69**, 529-541
- 1094 23. Shi, T., Gao, Y., Gaffrey, M. J., Nicora, C. D., Fillmore, T. L., Chrisler, W. B., Gritsenko, M. A.,  
1095 Wu, C., He, J., Bloodsworth, K. J., Zhao, R., Camp, D. G., 2nd, Liu, T., Rodland, K. D., Smith, R.  
1096 D., Wiley, H. S., and Qian, W. J. (2015) Sensitive targeted quantification of ERK  
1097 phosphorylation dynamics and stoichiometry in human cells without affinity enrichment.  
1098 *Anal Chem.* **87**, 1103-1110
- 1099 24. Aldous, S. H., Weise, S. E., Sharkey, T. D., Waldera-Lupa, D. M., Stuhler, K., Mallmann, J.,  
1100 Groth, G., Gowik, U., Westhoff, P., and Arsova, B. (2014) Evolution of the  
1101 phosphoenolpyruvate carboxylase protein kinase family in C3 and C4 *Flaveria spp.* *Plant*  
1102 *Physiol.* **165**, 1076-1091
- 1103 25. Yi, L., Shi, T., Gritsenko, M. A., X'Avia Chan, C. Y., Fillmore, T. L., Hess, B. M., Swensen, A. C.,  
1104 Liu, T., Smith, R. D., Wiley, H. S., and Qian, W. J. (2018) Targeted quantification of  
1105 phosphorylation dynamics in the context of EGFR-MAPK pathway. *Anal Chem.* **90**, 5256-5263
- 1106 26. Chen, R., Xie, R., Meng, Z., Ma, S., and Guan, K. L. (2019) STRIPAK integrates upstream signals  
1107 to initiate the Hippo kinase cascade. *Nat Cell Biol.* **21**, 1565-1577
- 1108 27. Heng, B. C., Zhang, X., Aubel, D., Bai, Y., Li, X., Wei, Y., Fussenegger, M., and Deng, X. (2020)  
1109 An overview of signaling pathways regulating YAP/TAZ activity. *Cell Mol Life Sci.*
- 1110 28. Bae, S. J., Ni, L., Osinski, A., Tomchick, D. R., Brautigam, C. A., and Luo, X. (2017) SAV1  
1111 promotes Hippo kinase activation through antagonizing the PP2A phosphatase STRIPAK. *Elife.*  
1112 **6**, e30278
- 1113 29. Bae, S. J., Ni, L., and Luo, X. (2020) STK25 suppresses Hippo signaling by regulating SAV1-  
1114 STRIPAK antagonism. *Elife.* **9**
- 1115 30. Heilig, Y., Dettmann, A., Mouriño-Pérez, R. R., Schmitt, K., Valerius, O., and Seiler, S. (2014)  
1116 Proper actin ring formation and septum constriction requires coordinated regulation of SIN  
1117 and MOR pathways through the germinal centre kinase MST-1. *PLoS Genet.* **10**, e1004306
- 1118 31. Singh, N. S., Shao, N., McLean, J. R., Sevugan, M., Ren, L., Chew, T. G., Bimbo, A., Sharma, R.,  
1119 Tang, X., Gould, K. L., and Balasubramanian, M. K. (2011) SIN-inhibitory phosphatase complex  
1120 promotes Cdc11p dephosphorylation and propagates SIN asymmetry in fission yeast. *Curr*  
1121 *Biol.* **21**, 1968-1978
- 1122 32. Justa-Schuch, D., Heilig, Y., Richthammer, C., and Seiler, S. (2010) Septum formation is  
1123 regulated by the RHO4-specific exchange factors BUD3 and RGF3 and by the landmark  
1124 protein BUD4 in *Neurospora crassa*. *Mol Microbiol.* **76**, 220-235
- 1125 33. Zhong, G., Wei, W., Guan, Q., Ma, Z., Wei, H., Xu, X., Zhang, S., and Lu, L. (2012)  
1126 Phosphoribosyl pyrophosphate synthetase, as a suppressor of the sepH mutation in  
1127 *Aspergillus nidulans*, is required for the proper timing of septation. *Mol Microbiol.* **86**, 894-  
1128 907
- 1129 34. Bohnert, K. A., Grzegorzewska, A. P., Willet, A. H., Vander Kooi, C. W., Kovar, D. R., and  
1130 Gould, K. L. (2013) SIN-dependent phosphoinhibition of formin multimerization controls  
1131 fission yeast cytokinesis. *Genes Dev.* **27**, 2164-2177
- 1132 35. Westfall, P. J., and Momany, M. (2002) *Aspergillus nidulans* septin AspB plays pre- and  
1133 postmitotic roles in septum, branch, and conidiophore development. *Mol Biol Cell.* **13**, 110-  
1134 118

- 1135 36. Vargas-Muñiz, J. M., Renshaw, H., Richards, A. D., Waitt, G., Soderblom, E. J., Moseley, M. A.,  
1136 Asfaw, Y., Juvvadi, P. R., and Steinbach, W. J. (2016) Dephosphorylation of the core septin,  
1137 AspB, in a protein phosphatase 2A-dependent manner impacts its localization and function in  
1138 the fungal pathogen *Aspergillus fumigatus*. *Front Microbiol.* **7**, 997
- 1139 37. Mendoza, M., Redemann, S., and Brunner, D. (2005) The fission yeast MO25 protein  
1140 functions in polar growth and cell separation. *Eur J Cell Biol.* **84**, 915-926
- 1141 38. Jerpseth, B., Greener, A., Short, J., Viola, J., and Kretz, P. (1992) XL1-blue MRF= *E. coli* cells:  
1142 *mcrA*-, *mcrCB*-, *mcrF*-, *mmr*-, *hsdR*- derivative of XL1-blue cells. *Mol Biol* **5**, 81-83
- 1143 39. Sambrook, J., and Russel, D. (2001) *Molecular cloning: a laboratory manual*, Cold Spring  
1144 Harbor Laboratory Press, NY
- 1145 40. Engh, I., Würtz, C., Witzel-Schlömp, K., Zhang, H. Y., Hoff, B., Nowrousian, M., Rottensteiner,  
1146 H., and Kück, U. (2007) The WW domain protein PRO40 is required for fungal fertility and  
1147 associates with woronin bodies. *Eukaryot Cell.* **6**, 831-843
- 1148 41. Dirschnabel, D. E., Nowrousian, M., Cano-Dominguez, N., Aguirre, J., Teichert, I., and Kück, U.  
1149 (2014) New insights into the roles of NADPH oxidases in sexual development and ascospore  
1150 germination in *Sordaria macrospora*. *Genetics.* **196**, 729-744
- 1151 42. Dickhut, C., Feldmann, I., Lambert, J., and Zahedi, R. P. (2014) Impact of digestion conditions  
1152 on phosphoproteomics. *J Proteome Res.* **13**, 2761-2770
- 1153 43. Cohen, S. A., and Michaud, D. P. (1993) Synthesis of a fluorescent derivatizing reagent, 6-  
1154 aminoquinolyl-N-hydroxysuccinimidyl carbamate, and its application for the analysis of  
1155 hydrolysate amino acids via high-performance liquid chromatography. *Anal Biochem.* **211**,  
1156 279-287
- 1157 44. MacLean, B., Tomazela, D. M., Shulman, N., Chambers, M., Finney, G. L., Frewen, B., Kern, R.,  
1158 Tabb, D. L., Liebler, D. C., and MacCoss, M. J. (2010) Skyline: an open source document editor  
1159 for creating and analyzing targeted proteomics experiments. *Bioinformatics.* **26**, 966-968
- 1160 45. Team, R. C. (2016) R: A Language and Environment for Statistical Computing. in *R Foundation*  
1161 *for Statistical Computing*, Vienna, Austria.
- 1162 46. Choi, M., Chang, C. Y., Clough, T., Broudy, D., Killeen, T., MacLean, B., and Vitek, O. (2014)  
1163 MSstats: an R package for statistical analysis of quantitative mass spectrometry-based  
1164 proteomic experiments. *Bioinformatics.* **30**, 2524-2526
- 1165 47. Sharma, V., Eckels, J., Schilling, B., Ludwig, C., Jaffe, J. D., MacCoss, M. J., and MacLean, B.  
1166 (2018) Panorama public: A public repository for quantitative data sets processed in skyline.  
1167 *Mol Cell Proteomics.* **17**, 1239-1244
- 1168
